# Supplementary material
Source: publisher figshare collection journal article supplement (https://karger.figshare.com/articles/dataset/_/5120494)
Supplement: Supplementary file 1 [file 1]

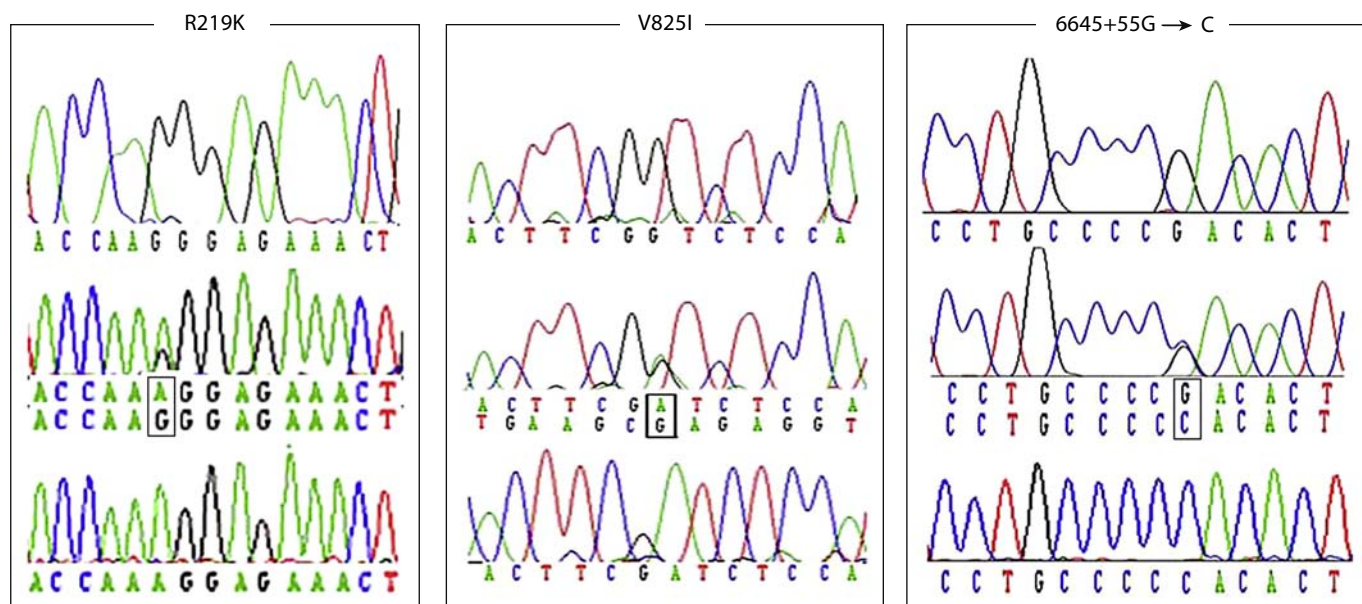

**Online Supplement Figure 3. The chromatograms of R219K, V825I and 6645+55G→C SNPs.** Normal sequences are shown in the upper part of the figure, and the corresponding SNP sequences are shown in the middle (heterozygosis) and lower (homozygosis) panels.
