# Supplementary material
Source: publisher figshare collection journal article supplement (https://karger.figshare.com/articles/dataset/_/5120494)
Supplement: Supplementary file 2 [file 1]

**Online Supplement Table 1.** Primers of *BACAI* and conditions of PCR

| Primers | Oligonucleotide of primers                            | Annealing temperatures |
|---------|-------------------------------------------------------|------------------------|
| Exon 7  | 5 -AAAGACTTCAAGGACCCAG-3<br>5 -ACAAAGTCATGCTGTCCAAG-3 | 61                     |
| Exon 14 | 5 -GGCTTGGTAAGGGTAGTAG-3<br>5 -TCTGGCACAGTATAAACTGG-3 | 60                     |
| Exon 17 | 5 -GAGACTGACCAGGAAATGG-3<br>5 -ATGCACTGCAGAGATTCTAG-3 | 61                     |
| Exon 19 | 5 -CATGGAGAGAAGGCACTTC-3<br>5 -CTAACTCTACTGCAGAACC-3  | 61                     |
| Exon 49 | 5 -ATGGCACAAGTTGGGTTC-3<br>5 -ATACAAACTGCTCTTGGAC-3   | 61                     |
